# Supplementary material for: The Impact of Vision Impairment (IVI) Questionnaire; Validation of the Thai-Version and the Implementation on Vision-Related Quality of Life in Thai Rural Community
Source: PubMed Central journal article supplement (PMC4871442; doi:10.1371/journal.pone.0155509), 2016-05-18
Supplement: pone.0155509.s002.pdf [file pone.0155509.s002.pdf]

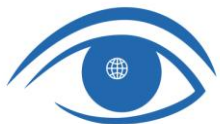

# แบบทดสอบประเมินผลกระทบของความผิดปกติในการมองเห็น

(แปลจากแบบทดสอบของศูนย์วิจัยทางจักษุวิทยา ประเทศออสเตรเลีย 2550)

## คำแนะนำ

กรุณาอ่านคำถามอย่างรอบคอบและทำเครื่องหมายวงกลม  รอบคำตอบที่ตรงกับท่านมากที่สุด

วงกลมเพียงครั้งเดียวในแต่ละแถว

หากท่านสวมแว่นตา คอนแทคเลนส์ หรืออุปกรณ์ช่วยขยาย ในการทำกิจกรรมบางอย่าง กรุณาเลือกคำตอบตามที่ท่านสามารถมองเห็นขณะใส่แว่นตาหรือคอนแทคเลนส์

ต่อไปนี้เป็นตัวอย่าง 2 ข้อ

ในเดือนที่ผ่านมา บ่อยครั้งเพียงใดที่การมองเห็นของท่านทำให้ท่านมีความรู้สึกวิตกกังวลเกี่ยวกับสิ่งต่อไปนี้

|                         | ไม่เลย | เล็กน้อย | ปานกลาง                            | มาก                                | ไม่ได้ทำกิจกรรมนี้ด้วยเหตุผลอื่น |
|-------------------------|--------|----------|------------------------------------|------------------------------------|----------------------------------|
| ข้ามถนน                 | 0      | 1        | 2                                  | <input checked="" type="radio"/> 3 | 8                                |
| จัดเตรียมอาหารด้วยตนเอง | 0      | 1        | <input checked="" type="radio"/> 2 | 3                                  | 8                                |

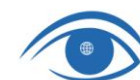

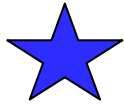

## เริ่มทำตรงนี้ และโปรดจำ

ทำเครื่องหมายวงกลมเพียงหนึ่งวงในแต่ละแถวและโปรดอย่าปล่อยให้แถวว่าง

เลือกคำตอบตามที่ท่านมองเห็นขณะใส่แว่นตา คอนแทคเลนส์ หรืออุปกรณ์ช่วยขยาย (ถ้าใช้)

### ในเดือนที่ผ่านมา บ่อยครั้งเพียงใดที่ท่านมองเห็นของท่านรบกวนการทำกิจกรรมต่อไปนี้

|                                                                                       | ไม่เลย | เล็กน้อย | ปานกลาง | มาก | ไม่ได้ทำกิจกรรมนี้<br>ด้วยเหตุผลอื่น (ที่ไม่<br>เกี่ยวกับการมองเห็น) | ขอบเขตการประเมิน                     |
|---------------------------------------------------------------------------------------|--------|----------|---------|-----|----------------------------------------------------------------------|--------------------------------------|
| 1. การรับชมและเพลิดเพลินกับรายการโทรทัศน์                                             | 0      | 1        | 2       | 3   | 8                                                                    | การอ่านและการเข้าถึงข้อมูล           |
| 2. การเข้าร่วมกิจกรรมสันทนาการ เช่น การเดินเล่น<br>วิ่งจ็อกกิ้ง เปตอง หรือเดินแอโรบิค | 0      | 1        | 2       | 3   | 8                                                                    | การเคลื่อนไหวและไม่ต้องพึ่งพาผู้อื่น |
| 3. การจับจ่ายซื้อของ (เลือกหาสิ่งที่ต้องการและ<br>จ่ายเงินซื้อ)                       | 0      | 1        | 2       | 3   | 8                                                                    | การอ่านและการเข้าถึงข้อมูล           |
| 4. เยี่ยมเยียนเพื่อนฝูงและญาติ                                                        | 0      | 1        | 2       | 3   | 8                                                                    | การเคลื่อนไหวและไม่ต้องพึ่งพาผู้อื่น |
| 5. การจดจำทำทนายและพบปะผู้คน                                                          | 0      | 1        | 2       | 3   | 8                                                                    | การอ่านและการเข้าถึงข้อมูล           |
| 6. การดูแลภาพลักษณ์ของตนเองโดยทั่วไป<br>(แต่งหน้า หวีผม จัดแต่งเสื้อผ้า และอื่น ๆ)    | 0      | 1        | 2       | 3   | 8                                                                    | การอ่านและการเข้าถึงข้อมูล           |
| 7. เปิดบรรจุภัณฑ์ (เช่น อาหาร ยา)                                                     | 0      | 1        | 2       | 3   | 8                                                                    | การอ่านและการเข้าถึงข้อมูล           |

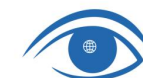

เลือกคำตอบตามที่ท่านมองเห็นขณะใส่แว่นตา คอนแทคเลนส์ หรืออุปกรณ์ช่วยขยาย (ถ้าใช้)

ในเดือนที่ผ่านมา บ่อยครั้งเพียงใดที่การมองเห็นของท่านรบกวนการทำกิจกรรมต่อไปนี้

|                                                                                                                  | ไม่เลย | เล็กน้อย | ปานกลาง | มาก | ไม่ได้ทำกิจกรรมนี้<br>ด้วยเหตุผลอื่น (ที่ไม่<br>เกี่ยวกับการมองเห็น) | ขอบเขตการประเมิน                     |
|------------------------------------------------------------------------------------------------------------------|--------|----------|---------|-----|----------------------------------------------------------------------|--------------------------------------|
| 8. อ่านฉลากและคำแนะนำการใช้ยา                                                                                    | 0      | 1        | 2       | 3   | 8                                                                    | การอ่านและการเข้าถึงข้อมูล           |
| 9. ใช้งานอุปกรณ์เครื่องใช้ในบ้านและโทรศัพท์                                                                      | 0      | 1        | 2       | 3   | 8                                                                    | การอ่านและการเข้าถึงข้อมูล           |
| 10. การมองเห็นของท่านรบกวนการออกไปใช้ชีวิต<br>นอกบ้านมากนักเพียงใด (การเดินทางเท้า การ<br>ข้ามถนน)               | 0      | 1        | 2       | 3   | 8                                                                    | การเคลื่อนไหวและไม่ต้องพึ่งพาผู้อื่น |
| 11. ในเดือนที่ผ่านมา สภาพการมองเห็นของท่านทำ<br>ให้ท่านต้องระมัดระวังการสะดุดหกล้มมากนัก<br>เพียงใด              | 0      | 1        | 2       | 3   | 8                                                                    | การเคลื่อนไหวและไม่ต้องพึ่งพาผู้อื่น |
| 12. โดยทั่วไป การมองเห็นของท่านรบกวนการ<br>เดินทางท่องเที่ยวหรือโดยสารพาหนะ (เช่น<br>รถเมล์ รถไฟ) มากน้อยเพียงใด | 0      | 1        | 2       | 3   | 8                                                                    | การเคลื่อนไหวและไม่ต้องพึ่งพาผู้อื่น |
| 13. การก้าวลงขั้นบันได ทางต่างระดับ หรือขอบ<br>ทางเดิน                                                           | 0      | 1        | 2       | 3   | 8                                                                    | การเคลื่อนไหวและไม่ต้องพึ่งพาผู้อื่น |

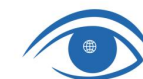

เลือกคำตอบตามที่ท่านมองเห็นขณะใส่แว่นตา คอนแทคเลนส์ หรืออุปกรณ์ช่วยขยาย (ถ้าใช้)

ในเดือนที่ผ่านมา บ่อยครั้งเพียงใดที่การมองเห็นของท่านรบกวนการทำกิจกรรมต่อไปนี้

|                                             | ไม่เลย | พอสมควร | มาก | ไม่ได้ทำกิจกรรมนี้ด้วยเหตุผลอื่น<br>(ที่ไม่เกี่ยวกับการมองเห็น) | ขอบเขตการประเมิน           |
|---------------------------------------------|--------|---------|-----|-----------------------------------------------------------------|----------------------------|
| 14. อ่านตัวพิมพ์ขนาดปกติ (เช่นหนังสือพิมพ์) | 0      | 1       | 2   | 8                                                               | การอ่านและการเข้าถึงข้อมูล |
| 15. ค้นหาข้อมูลที่ต้องการ                   | 0      | 1       | 2   | 8                                                               | การอ่านและการเข้าถึงข้อมูล |

เลือกคำตอบตามที่ท่านมองเห็นขณะใส่แว่นตา คอนแทคเลนส์ หรืออุปกรณ์ช่วยขยาย (ถ้าใช้)

ในเดือนที่ผ่านมา บ่อยครั้งเพียงใดที่การมองเห็นของท่านทำให้ท่านมีความรู้สึกวิตกกังวลเกี่ยวกับสิ่งต่อไปนี้

|                                                                                                                          | ไม่เลย | น้อยครั้ง | พอสมควร | บ่อยครั้งมาก | ขอบเขตการประเมิน                     |
|--------------------------------------------------------------------------------------------------------------------------|--------|-----------|---------|--------------|--------------------------------------|
| 16. ความปลอดภัยโดยทั่วไปในการใช้ชีวิตภายในบ้าน                                                                           | 0      | 1         | 2       | 3            | การเคลื่อนไหวและไม่ต้องพึ่งพาผู้อื่น |
| 17. การทำของหนักหรือทำสิ่งของตกแตก                                                                                       | 0      | 1         | 2       | 3            | การเคลื่อนไหวและไม่ต้องพึ่งพาผู้อื่น |
| 18. ความปลอดภัยโดยทั่วไปเวลาใช้ชีวิตนอกบ้าน                                                                              | 0      | 1         | 2       | 3            | การเคลื่อนไหวและไม่ต้องพึ่งพาผู้อื่น |
| 19. ในเดือนที่ผ่านมา บ่อยครั้งเพียงใดที่การมองเห็นของท่านเป็นอุปสรรคขัดขวางทำให้ท่านต้องล้มเลิกการทำสิ่งที่ท่านต้องการทำ | 0      | 1         | 2       | 3            | การเคลื่อนไหวและไม่ต้องพึ่งพาผู้อื่น |
| 20. ในเดือนที่ผ่านมา บ่อยครั้งเพียงใดที่ท่านต้องการความช่วยเหลือจากผู้อื่นเนื่องจากปัญหาการมองเห็นของท่าน                | 0      | 1         | 2       | 3            | การเคลื่อนไหวและไม่ต้องพึ่งพาผู้อื่น |

เลือกคำตอบตามที่ท่านมองเห็นขณะใส่แว่นตา คอนแทคเลนส์ หรืออุปกรณ์ช่วยขยาย (ถ้าใช้)

ให้นึกถึงความรู้สึกที่ท่านมีต่อการมองเห็นของตนเองในเดือนที่ผ่านมา

|                                                                                                                                           | ไม่เลย | น้อยครั้ง | พอสมควร | บ่อยครั้งมาก | ขอบเขตการประเมิน |
|-------------------------------------------------------------------------------------------------------------------------------------------|--------|-----------|---------|--------------|------------------|
| 21. ท่านรู้สึกอับอายกับความสามารถในการมองเห็นของตนเองหรือไม่                                                                              | 0      | 1         | 2       | 3            | สภาวะอารมณ์      |
| 22. ท่านรู้สึกท้อแท้หรือรำคาญเนื่องจากความสามารถในการมองเห็นของตนเองหรือไม่                                                               | 0      | 1         | 2       | 3            | สภาวะอารมณ์      |
| 23. ท่านรู้สึกเปล่าเปลี่ยวหรือโดดเดี่ยวอันมีสาเหตุเนื่องจากความสามารถในการมองเห็นของตนเองหรือไม่                                          | 0      | 1         | 2       | 3            | สภาวะอารมณ์      |
| 24. ท่านรู้สึกเศร้าเสียใจหรือรู้สึกด้อยค่าอันมีสาเหตุเนื่องจากความสามารถในการมองเห็นของตนเองหรือไม่                                       | 0      | 1         | 2       | 3            | สภาวะอารมณ์      |
| 25. ในเดือนที่ผ่านมา ท่านรู้สึกวิตกกังวลว่าความสามารถในการมองเห็นของตนเองจะแย่ลงบ่อยครั้งเพียงใด                                          | 0      | 1         | 2       | 3            | สภาวะอารมณ์      |
| 26. ในเดือนที่ผ่านมา ความสามารถในการมองเห็นของท่านทำให้ท่านรู้สึกวิตกกังวลเกี่ยวกับการจัดการเรื่องราวต่างๆในชีวิตประจำวันบ่อยครั้งเพียงใด | 0      | 1         | 2       | 3            | สภาวะอารมณ์      |
| 27. ท่านรู้สึกว่าตนเองเป็นภาระต้องรบกวนผู้อื่นเนื่องจากความสามารถในการมองเห็นของตนเองหรือไม่                                              | 0      | 1         | 2       | 3            | สภาวะอารมณ์      |
| 28. ในเดือนที่ผ่านมา ความสามารถในการมองเห็นของท่านรบกวนการดำเนินชีวิตโดยรวมมากน้อยเพียงใด                                                 | 0      | 1         | 2       | 3            | สภาวะอารมณ์      |

กรุณาตรวจสอบว่าท่านได้ตอบครบทุกคำถาม ขอขอบพระคุณ
