# Supplementary material for: The Impact of Vision Impairment (IVI) Questionnaire; Validation of the Thai-Version and the Implementation on Vision-Related Quality of Life in Thai Rural Community
Source: PubMed Central journal article supplement (PMC4871442; doi:10.1371/journal.pone.0155509), 2016-05-18
Supplement: pone.0155509.s003.pdf [file pone.0155509.s003.pdf]

**Additional file 3.** Questionnaire items and scoring characteristics in Thai patients with visual defects.

| Items                                           | Cataracts      |               | AMD            |               | Diabetic Retinopathy |               | Glaucoma       |               |
|-------------------------------------------------|----------------|---------------|----------------|---------------|----------------------|---------------|----------------|---------------|
|                                                 | Range, min/max | Relevant, (%) | Range, min/max | Relevant, (%) | Range, min/max       | Relevant, (%) | Range, min/max | Relevant, (%) |
| 1. (R) Watching and enjoying TV                 | 0/3            | 96.7          | 0/3            | 100           | 0/3                  | 96.7          | 0/3            | 96.7          |
| 2. (M) Recreational activities                  | 0/3            | 90.0          | 0/3            | 96.7          | <b>0/2</b>           | 93.3          | 0/3            | 93.3          |
| 3. (R) Shopping                                 | 0/3            | 100           | 0/3            | 100           | 0/3                  | 100           | 0/3            | 86.7          |
| 4. (M) Visiting friends or family               | 0/3            | 93.3          | 0/3            | 100           | 0/3                  | 93.3          | 0/3            | 93.3          |
| 5. (R) Recognizing or meeting people            | 0/3            | 100.0         | 0/3            | 100           | 0/3                  | 100           | 0/3            | 100           |
| 6. (R) Looking after appearance                 | 0/3            | 100           | 0/3            | 100           | 0/3                  | 100           | 0/3            | 100           |
| 7. (R) Opening packaging                        | 0/3            | 100           | 0/3            | 93.3          | 0/3                  | 100           | 0/3            | 100           |
| 8. (R) Reading medical labels                   | 0/3            | 96.7          | 0/3            | 90.0          | 0/3                  | 100           | 0/3            | 93.3          |
| 9. (R) Operating housework                      | 0/3            | 96.7          | 0/3            | 100           | 0/3                  | 100           | 0/3            | 96.7          |
| 10. (M) Interfered with getting outdoors        | 0/3            | 100.0         | 0/3            | 96.7          | 0/3                  | 96.7          | 0/3            | 96.7          |
| 11. (M) Avoid falling or tripping               | 0/3            | 100           | 0/3            | 100           | 0/3                  | 100           | 0/3            | 100           |
| 12. (M) Travelling or using transport           | 0/3            | 93.3          | 0/3            | 96.7          | 0/3                  | 96.7          | 0/3            | 93.3          |
| 13. (M) Going down steps, stairs, or curbs      | 0/3            | 93.3          | 0/3            | 100           | 0/3                  | 96.7          | 0/3            | 96.7          |
| 14. (R) Reading ordinary size print             | 0/3            | 86.7          | 0/3            | 90.0          | <b>0/2</b>           | 96.7          | <b>0/2</b>     | 93.3          |
| 15. (R) Getting information                     | 0/3            | 76.7          | 0/3            | 90.0          | <b>0/2</b>           | 96.7          | <b>0/2</b>     | 93.3          |
| 16. (M) Safety at home                          | <b>0/2</b>     | 100           | 0/3            | 100           | 0/3                  | 100           | 0/3            | 100           |
| 17. (M) Spilling or breaking things             | 0/3            | 100           | <b>0/2</b>     | 100           | 0/3                  | 100           | <b>0/2</b>     | 100           |
| 18. (M) Safety outside the home                 | 0/3            | 100           | 0/3            | 100           | 0/3                  | 100           | 0/3            | 100           |
| 19. (M) Stopped doing the things                | 0/3            | 100           | 0/3            | 100           | 0/3                  | 100           | <b>0/2</b>     | 100           |
| 20. (M) Needed help from other people           | 0/3            | 100           | 0/3            | 100           | 0/3                  | 100           | 0/3            | 100           |
| 21. (E) Felt embarrassed                        | 0/3            | 100           | 0/3            | 100           | 0/3                  | 100           | <b>0/2</b>     | 100           |
| 22. (E) Felt frustrated or annoyed              | 0/3            | 100           | 0/3            | 100           | 0/3                  | 100           | <b>0/2</b>     | 100           |
| 23. (E) Felt lonely or isolated                 | 0/3            | 100           | 0/3            | 100           | 0/3                  | 100           | 0/3            | 100           |
| 24. (E) Felt sad or low                         | 0/3            | 100           | 0/3            | 100           | 0/3                  | 100           | <b>0/2</b>     | 100           |
| 25. (E) Worried about eyesight worsen           | 0/3            | 100           | 0/3            | 100           | 0/3                  | 100           | 0/3            | 100           |
| 26. (E) Worried about coping with everyday life | 0/3            | 100           | 0/3            | 100           | 0/3                  | 100           | 0/3            | 100           |
| 27. (E) Felt like a nuisance or a burden        | 0/3            | 100           | 0/3            | 100           | 0/3                  | 100           | 0/3            | 100           |
| 28. (E) Interfered with life in general         | 0/3            | 100           | 0/3            | 100           | 0/3                  | 100           | 0/3            | 100           |

*R, reading and accessing information; M, Mobility and independence; E, emotional well-being.*
